# Supplementary material for: The Complete Chloroplast Genome Sequence of Eupatorium fortunei: Genome Organization and Comparison with Related Species
Source: MDPI journal article supplement (doi:10.3390/genes14010064), 2022-12-25
Supplement: s1 [file s1]

**Table S1.** Chloroplast genome information table for 22 species in the article.

| GenBank acc. | Species                        | Plastome size (bp) | Genus                |
|--------------|--------------------------------|--------------------|----------------------|
| OK545755.1   | <i>Eupatorium fortunei</i>     | 152,401            | <i>Eupatorium</i>    |
| MT793847.1   | <i>Ageratina fastigiata</i>    | 152,369            | <i>Ageratina</i>     |
| NC_015621.1  | <i>Ageratina adenophora</i>    | 150,698            | <i>Ageratina</i>     |
| NC_031833.1  | <i>Mikania micrantha</i>       | 152,092            | <i>Mikania</i>       |
| NC_023833.1  | <i>Praxelis clematidea</i>     | 151,410            | <i>Praxelis</i>      |
| MT793836.1   | <i>Mikania glomerata</i>       | 151,773            | <i>Mikania</i>       |
| MT793837.1   | <i>Mikania haenkeana</i>       | 151,865            | <i>Mikania</i>       |
| MT793838.1   | <i>Mikania lehmannii</i>       | 152,062            | <i>Mikania</i>       |
| MT793839.1   | <i>Mikania neurocaula</i>      | 152,045            | <i>Mikania</i>       |
| MT793840.1   | <i>Mikania oblongifolia</i>    | 151,845            | <i>Mikania</i>       |
| MT793841.1   | <i>Mikania obtusata</i>        | 152,106            | <i>Mikania</i>       |
| MT793845.1   | <i>Mikania triangularis</i>    | 151,956            | <i>Mikania</i>       |
| MT793846.1   | <i>Stevia</i> sp. Oliveira 769 | 151,248            | <i>Stevia</i>        |
| MT793849.1   | <i>Mikania additicia</i>       | 151,983            | <i>Mikania</i>       |
| MT793850.1   | <i>Mikania brevifauca</i>      | 152,161            | <i>Mikania</i>       |
| MT793851.1   | <i>Mikania burchellii</i>      | 151,829            | <i>Mikania</i>       |
| MT793852.1   | <i>Mikania fasciculata</i>     | 152,070            | <i>Mikania</i>       |
| MT793853.1   | <i>Mikania purpurascens</i>    | 152,037            | <i>Mikania</i>       |
| MT793854.1   | <i>Mikania smaragdina</i>      | 152,020            | <i>Mikania</i>       |
| MT793855.1   | <i>Mikania sylvatica</i>       | 152,099            | <i>Mikania</i>       |
| NC_0356241   | <i>Platycodon grandiflorus</i> | 171,818            | <i>Campanulaceae</i> |
| NC_026203.1  | <i>Campanula takesimana</i>    | 169,551            | <i>Campanulaceae</i> |
